# Supplementary material
Source: Springer Nature journal article supplement (https://www.springermedizin.de/resource/supplementary/12967_2011_998_MOESM1_ESM.pdf/9573524)

## A. Antibody

Binding sites for protein G, A and L

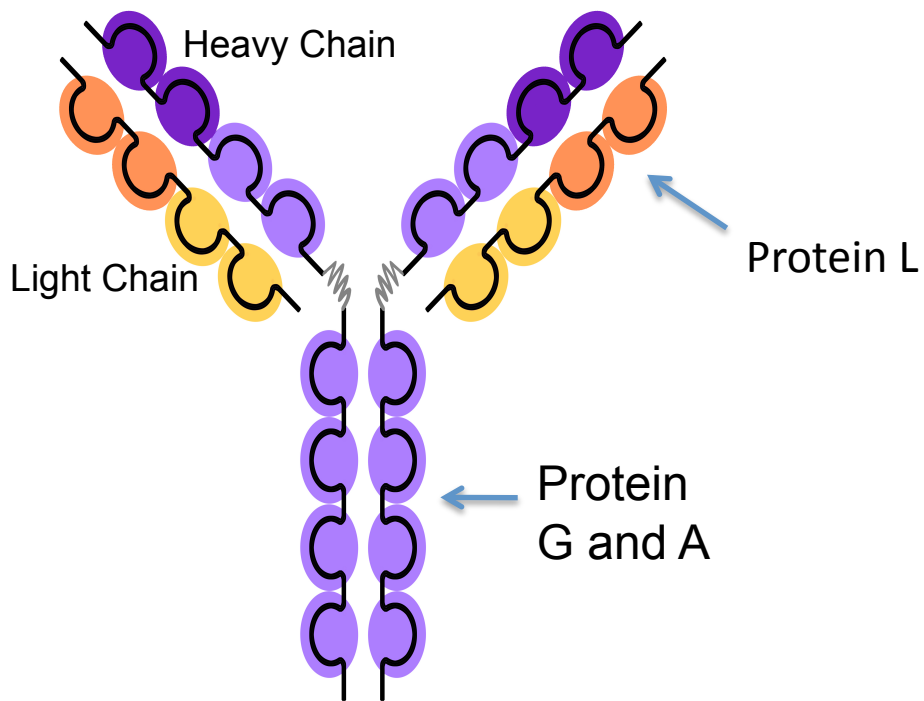

## B. CAR

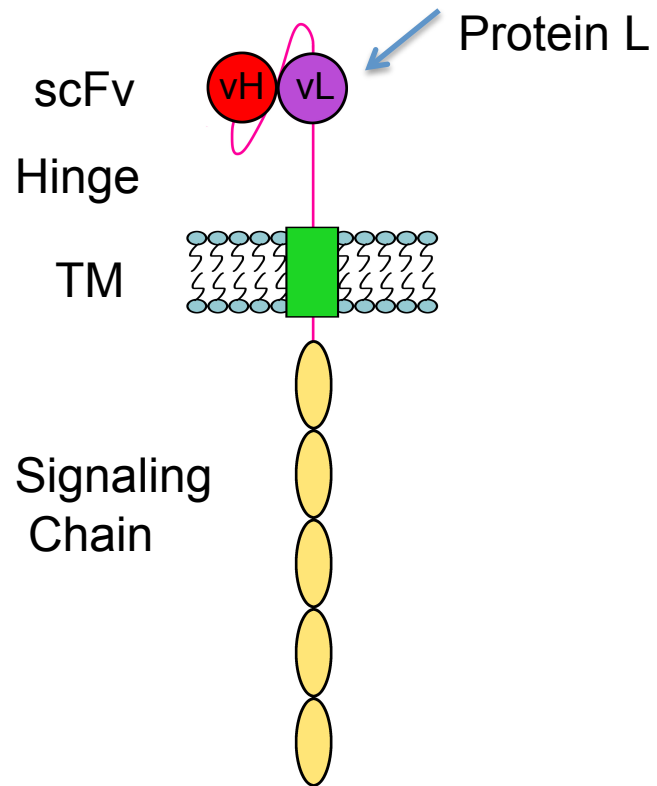

Supplement: MOESM1 [file 9573524]
